# Supplementary material
Source: PubMed Central journal article supplement (PMC6120343)
Supplement: NIHMS962487-supplement-Sup_Table_1.pdf [file NIHMS962487-supplement-Sup_Table_1.pdf]

## Supplementary Table 1: Cryo-EM data collection, refinement and validation statistics

|                                                               | DRP1-MID49<br>Filaments<br>(EMDB-EMD8874)<br>(PDB 5WP9)        |
|---------------------------------------------------------------|----------------------------------------------------------------|
| <b>Data collection and processing</b>                         |                                                                |
| Magnification                                                 | 31,000x                                                        |
| Voltage (kV)                                                  | 300                                                            |
| Per frame electron exposure (e <sup>-</sup> /Å <sup>2</sup> ) | 1.1 to 1.4                                                     |
| Defocus range (µm)                                            | 0.3-4                                                          |
| Median defocus                                                | 1.3                                                            |
| Pixel size (Å)                                                | 1.22                                                           |
| Symmetry imposed                                              | Translational, C2                                              |
| Initial particle images (no.)                                 | 489,879                                                        |
| Final particle images (no.)                                   | 410,639                                                        |
| Map resolution (Å)                                            | 4.2                                                            |
| FSC threshold                                                 | 0.143                                                          |
| Map resolution range (Å)                                      | 3.8-8.2, (ResMap <sup>74</sup><br>and LocScale <sup>72</sup> ) |
| <b>Refinement</b>                                             |                                                                |
| Initial model used (PDB code)                                 | 4BEJ, 4WOY, 3W6O                                               |
| Model resolution (Å)                                          | 4.5 (Average)                                                  |
| FSC threshold                                                 | 0.5                                                            |
| Model resolution range (Å)                                    | 4.1 to 8.2                                                     |
| Map sharpening <i>B</i> factor (Å <sup>2</sup> )              | -225 (Average)                                                 |
| DRP1 G-domain-BSE                                             | -200                                                           |
| DRP1 Stalk                                                    | -300 to -400                                                   |
| MID49                                                         | -150 to -200                                                   |
| Model composition                                             |                                                                |
| Non-hydrogen atoms                                            | 57968                                                          |
| Protein residues                                              | 7352                                                           |
| Ligands                                                       | 8 GMPPCP, 8 Mg                                                 |
| <i>B</i> factors (Å <sup>2</sup> )                            |                                                                |
| Protein                                                       | -58 to -626                                                    |
| Ligand                                                        | -145 to -169                                                   |
| R.M.S. deviations                                             |                                                                |
| Bond lengths (Å)                                              | 0.0107                                                         |
| Bond angles (°)                                               | 0.98                                                           |
| Validation                                                    |                                                                |
| MolProbity score                                              | 1.43                                                           |
| Clashscore                                                    | 2.1                                                            |
| Poor rotamers (%)                                             | 0.63                                                           |
| Ramachandran plot                                             |                                                                |
| Favored (%)                                                   | 93.11                                                          |
| Allowed (%)                                                   | 98.6                                                           |
| Outliers (%)                                                  | 1.43                                                           |

### References:

72. Jakobi, A. J., Wilmanns, M. & Sachse, C. Model-based local density sharpening of cryo-EM maps. *Elife* **6**, 1–26 (2017).

74. Kucukelbir, A., Sigworth, F. J. & Tagare, H. D. Quantifying the local resolution of cryo-EM density maps. *Nat. Methods* **11**, 63–65 (2014).
